# Supplementary material
Source: publisher site journal article supplement (https://www.dovepress.com/article/459593)
Supplement: Supplementary file 1 [file get_supplementary_file.php]

Table S1. List of antibodies used in flow cytometry

| Reagent | Parameter | Corporation |
| --- | --- | --- |
| CD3 | BV786 | Biolegend |
| CD4 | BUV395 | BD |
| CD8 | BV510 | Biolegend |
| PD-1 | BV711 | Biolegend |
| TIM-3 | BV650 | Biolegend |
| TIGIT | PE-CY7 | Biolegend |
| LAG-3 | APC-Fire750 | Biolegend |
| IL-6R | BV605 | Biolegend |
| c-MAF | PE | BD |
| p-STAT3 | AF488 | Biolegend |
| Annexin V | FITC | Biolegend |
| Ki67 | BV421 | Biolegend |
| GranzymeB | AF-700 | Biolegend |
| Perforin | APC-Fire750 | Biolegend |
| IFN-γ | PE | Biolegend |
| TNF-α | FITC | Biolegend |
| IL-2 | AF700 | Biolegend |
| CD44 | AF700 | Biolegend |
| CD62L | BV421 | Biolegend |

Figure S1


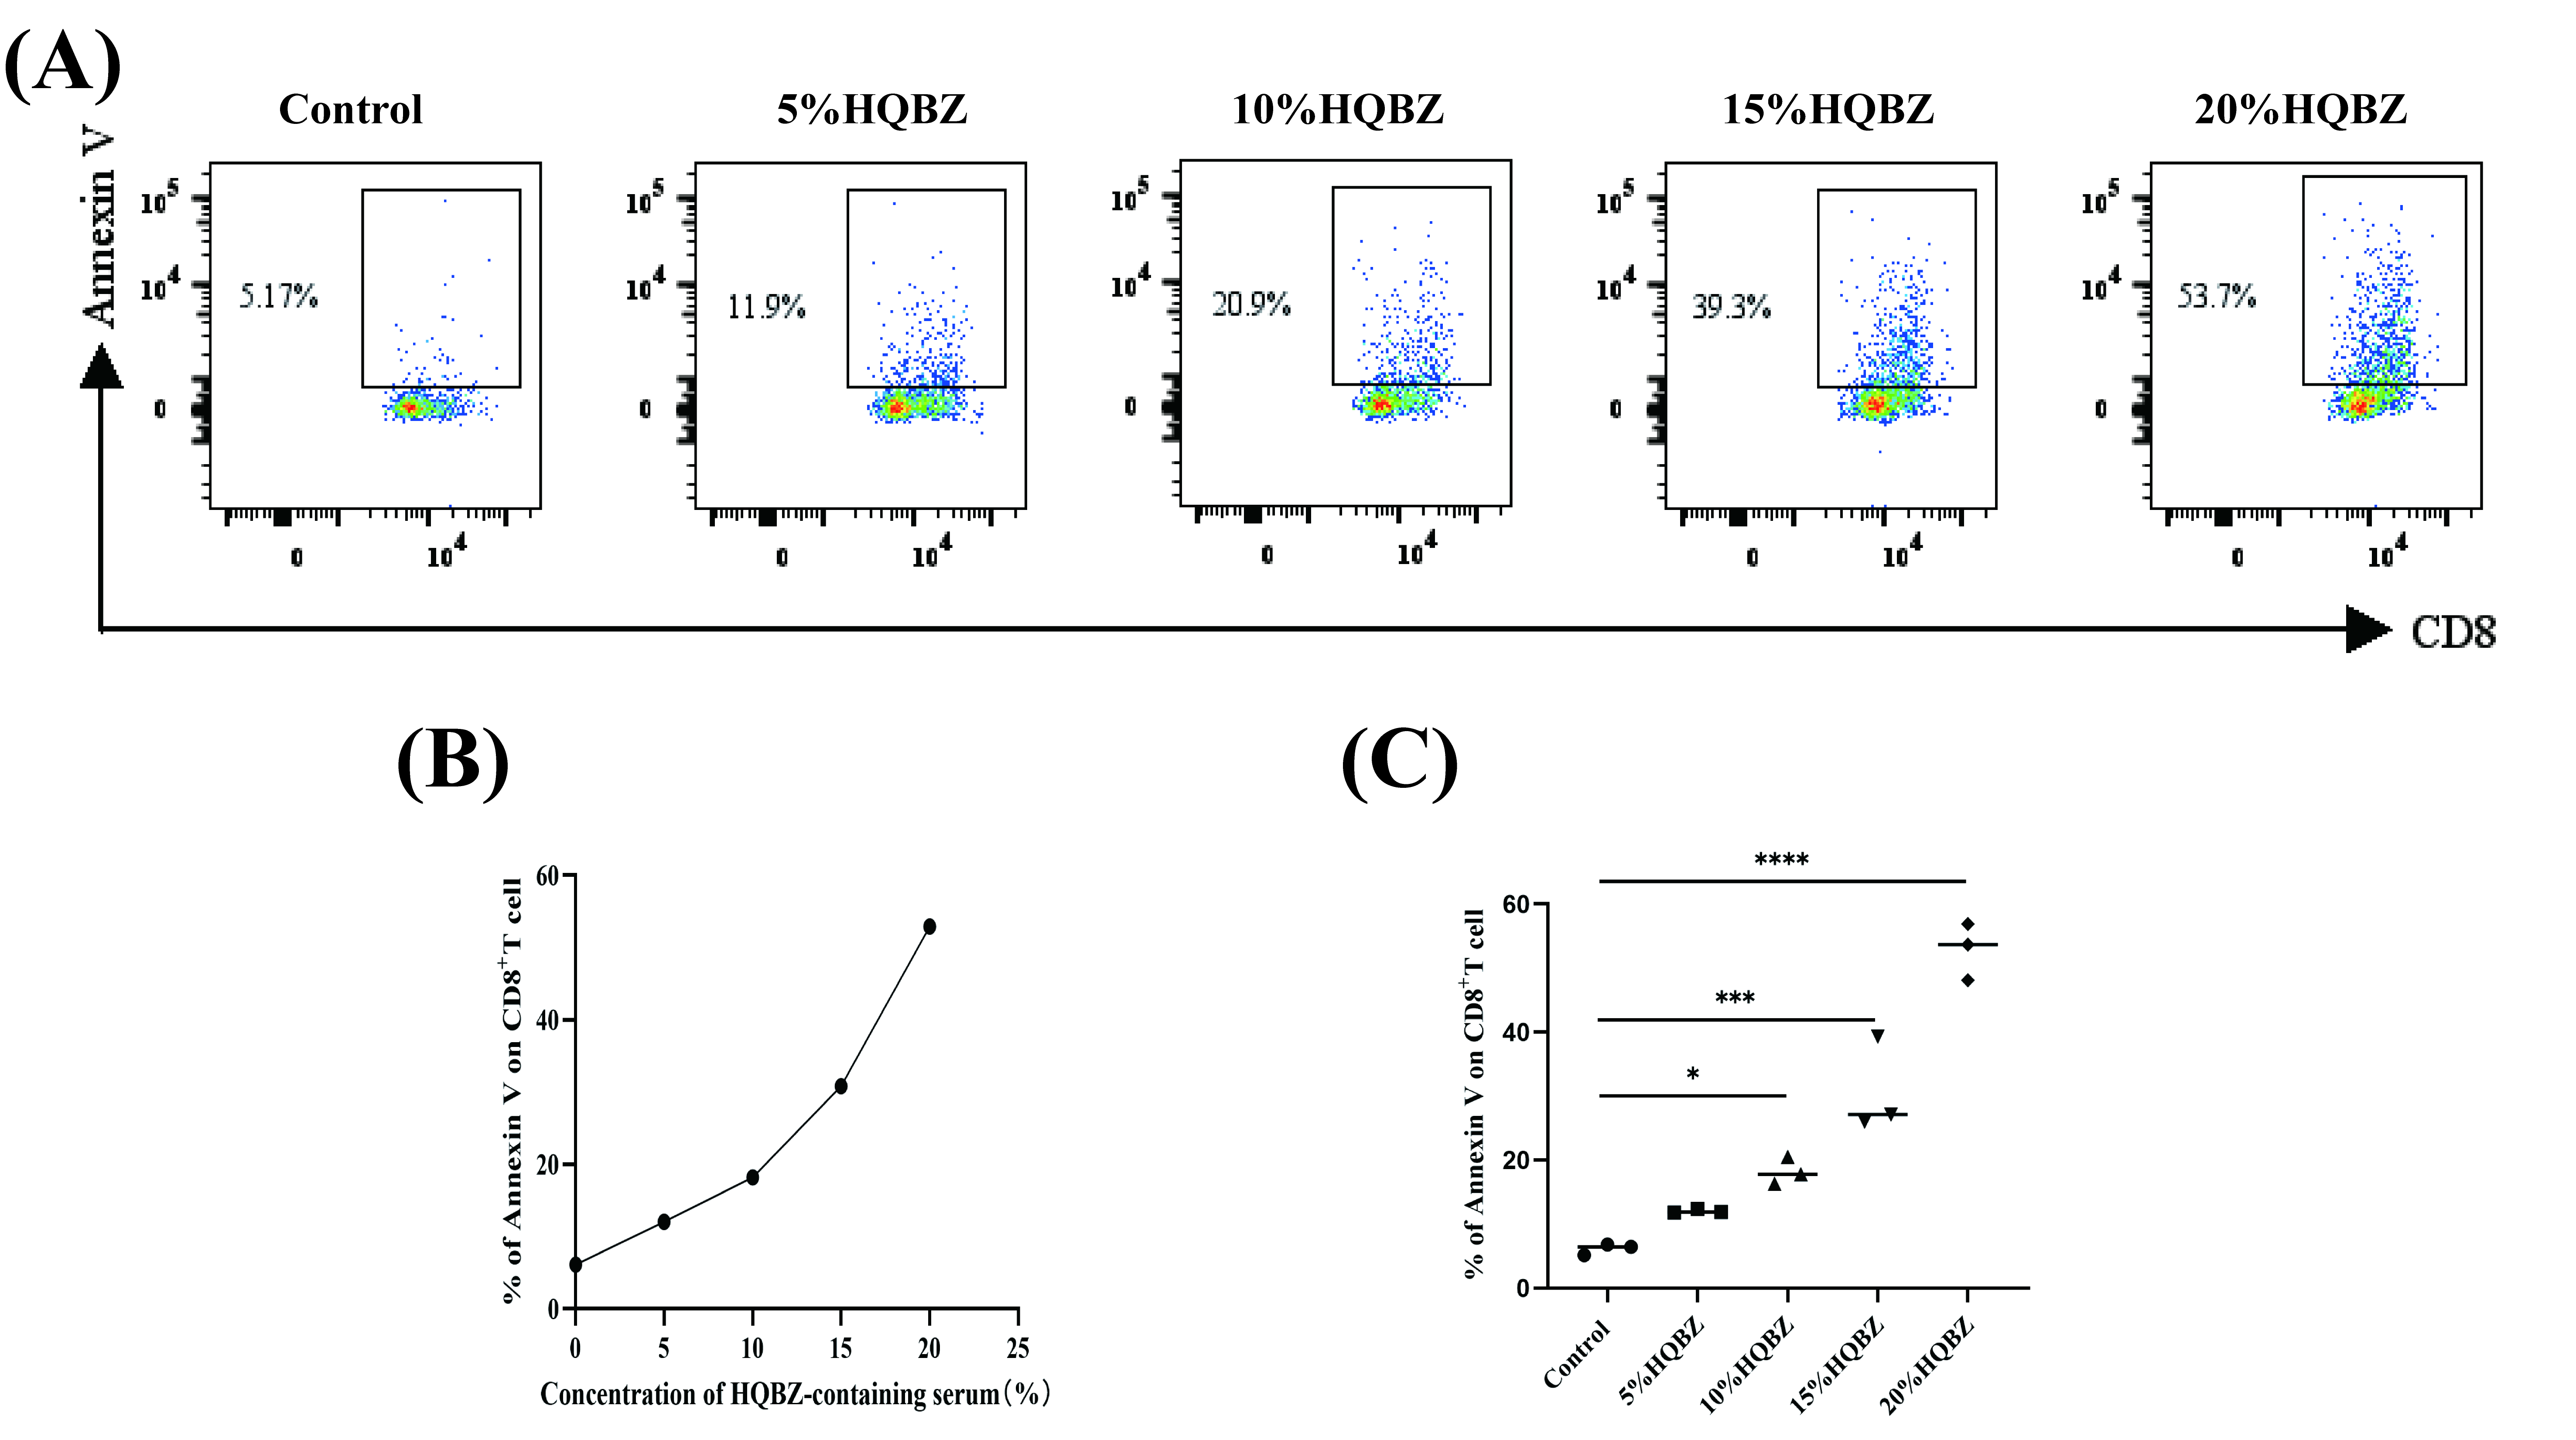


Flow cytometry the concentration of HQBZ-containing serum. (A) Representative flow cytometry image of effect of different HQBZ-containing serum concentration on apoptosis ratio of CD8+T cells. (B-C) Statistical analysis of the effect of different HQBZ-containing serum concentration on apoptosis ratio of CD8+T cells. Compared with the control group, *p<0.05, ***p<0.001, ****p<0.0001.

Figure S2


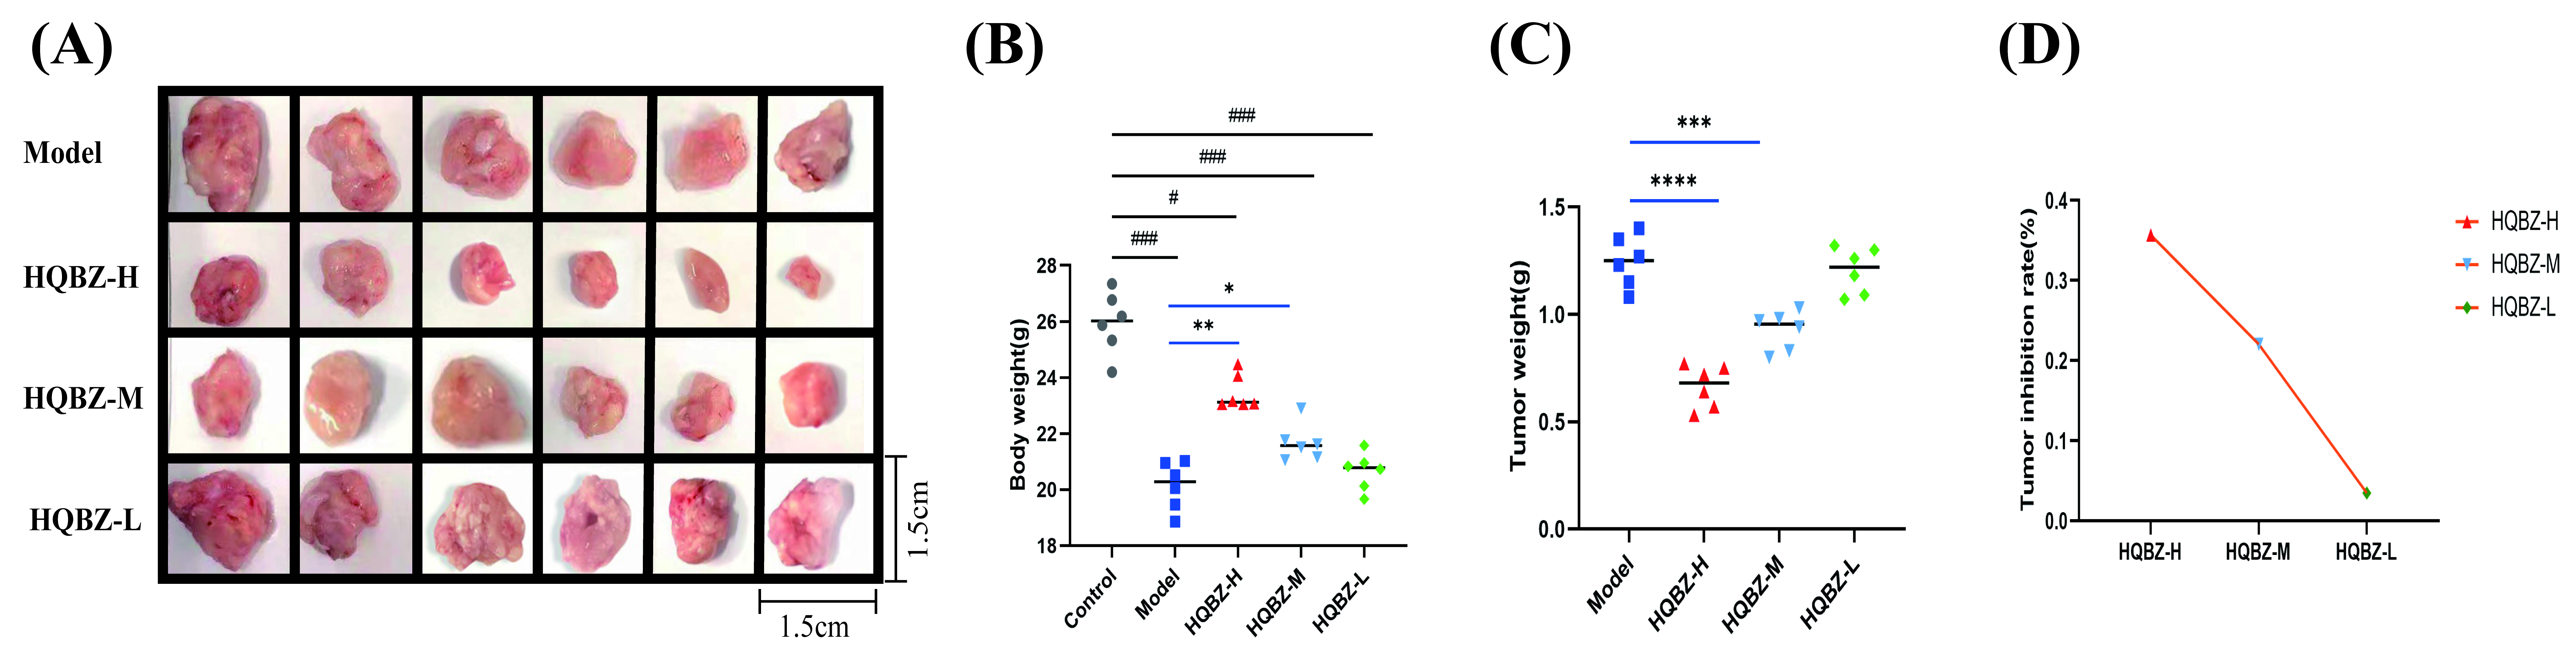


HQBZ inhibits H22 tumor growth. (A) Photographs of tumors in each group of mice. (B) Weight of mice in each group after treatment. (C) Tumor weight in each group. (D) Tumor inhibition rate in each group of mice. Each group is n=6, compared with the control group, #p<0.05, ### p<0.001; compared with the model group, *p<0.05, **p<0.01, ***p<0.001, ****p<0.0001.
